# Supplementary material for: Conformational isomerism involving the carboxylate groups of a linker in metal organic frameworks and its distinctive influence on the detection of ketones
Source: Royal Society of Chemistry journal article supplement (doi:10.1039/d1nj03865f), 2021-01-01
Supplement: d1nj03865f1.pdf [file d1nj03865f1.pdf]

## Electronic Supplementary Information

### Conformational isomerism involving carboxylate groups of a linker in metal organic frameworks and its distinctive influence on the detection of ketones†

Sandeep Kumar<sup>§</sup>, Himanshi Bhambri<sup>§</sup> and Sanjay K. Mandal\*

*Department of Chemical Sciences, Indian Institute of Science Education and Research Mohali, Sector 81, Manauli PO, S.A.S. Nagar, Mohali, Punjab 140306, India*

<sup>§</sup>Equal contribution

\*Corresponding Author's E-mail: sanjaymandal@iisermohali.ac.in

## Table of Contents

| <i>Items</i>                                                                                                                                      | <i>Page No.</i> |
|---------------------------------------------------------------------------------------------------------------------------------------------------|-----------------|
| Calculation for the squeezed solvent molecules in SCXRD                                                                                           | S3              |
| <b>Fig. S1</b> N <sub>2</sub> gas adsorption-desorption isotherms of <b>1</b> and <b>2</b> at 77 K.                                               | S3              |
| <b>Fig. S2</b> Simulated and experimental PXRD patterns for <b>1</b> and <b>2</b> .                                                               | S3              |
| <b>Fig. S3</b> Solid state reflectance of <b>H<sub>2</sub>bpaipa</b> and compound <b>1</b> and <b>2</b> .                                         | S4              |
| <b>Fig. S4</b> Luminescence spectra of <b>1</b> and <b>2</b> .                                                                                    | S4              |
| <b>Fig. S5</b> Sensing of different solvents by <b>1</b> and <b>2</b> .                                                                           | S5              |
| <b>Fig. S6-S8</b> Sensing of acetone in MeOH, EtOH and CH <sub>3</sub> CN by <b>1</b> .                                                           | S6-S8           |
| <b>Fig. S9-S11</b> Sensing of acetone in MeOH, EtOH and CH <sub>3</sub> CN by <b>2</b> .                                                          | S9-S11          |
| Detection limit calculation of acetone in MeOH, EtOH and CH <sub>3</sub> CN for <b>1</b> and <b>2</b> ( <b>Fig. S12-S17</b> and <b>Table S1</b> ) | S12-S15         |
| Comparison of detection limit of <b>1</b> and <b>2</b> with those reported in the literature ( <b>Table S2</b> )                                  | S16             |
| <b>Fig. S18-S24</b> Emission spectra of <b>1</b> (dispersed in methanol) upon incremental addition of derivatives of ketones.                     | S17-S20         |
| <b>Fig. S25-S31</b> Emission spectra of <b>2</b> (dispersed in methanol) upon incremental addition of derivatives of ketones.                     | S21-S23         |
| <b>Fig. S32-S35</b> Detection limit calculation of acetylacetone and determination of Stern-Volmer constant for <b>1</b> and <b>2</b> .           | S24-S27         |
| <b>Fig. S36</b> FESEM images of <b>1</b> before and after dipping in different ketones.                                                           | S27             |
| <b>Fig. S37</b> FESEM images of <b>2</b> before and after dipping in different ketones.                                                           | S28             |
| <b>Fig. S38</b> Spectral overlap plot between emission spectra of <b>H<sub>2</sub>bpaipa</b> and absorption spectra of various ketones.           | S28             |
| <b>Fig. S39</b> Spectral overlap plot between absorption spectra of <b>H<sub>2</sub>bpaipa</b> , <b>1</b> , <b>2</b> and acetylacetone.           | S29             |

### Calculation of determining solvent molecules squeezed out:

Number of electrons squeezed out = 183.4

$Z = 4$

Number of electrons squeezed out per unit formula =  $183.4/4 = 45.85$

Number of electrons in 5 H<sub>2</sub>O molecules = 50

Number of electrons squeezed out = 45.85

Support from TGA analysis

%weight loss due to 5 H<sub>2</sub>O molecules =  $(90/516.8) \times 100\% = 17.4\%$ ; this is in good agreement with the experimental value (16%)

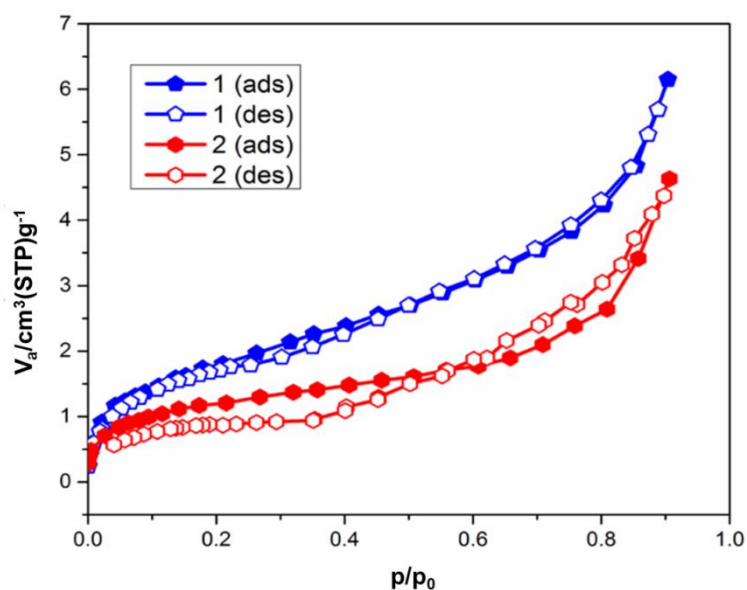

**Fig. S1** N<sub>2</sub> gas adsorption-desorption isotherms of **1** and **2** at 77 K.

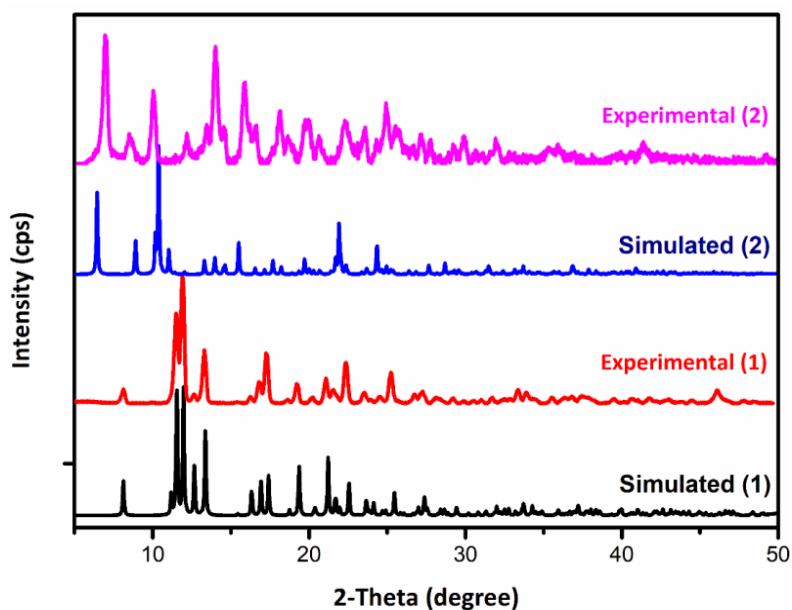

**Fig. S2** Simulated and experimental PXRD patterns for **1** and **2**.

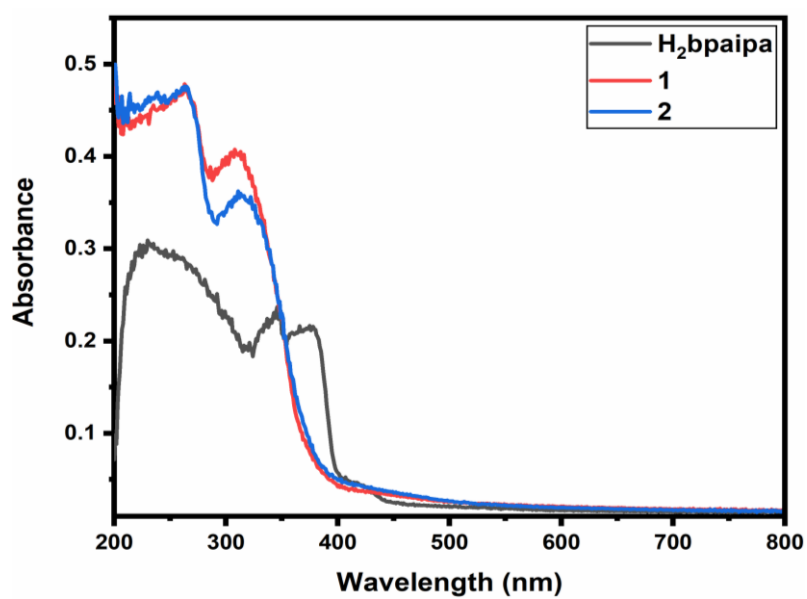

**Fig. S3** Solid state diffuse reflectance spectra of **H<sub>2</sub>bpaipa**, **1** and **2**.

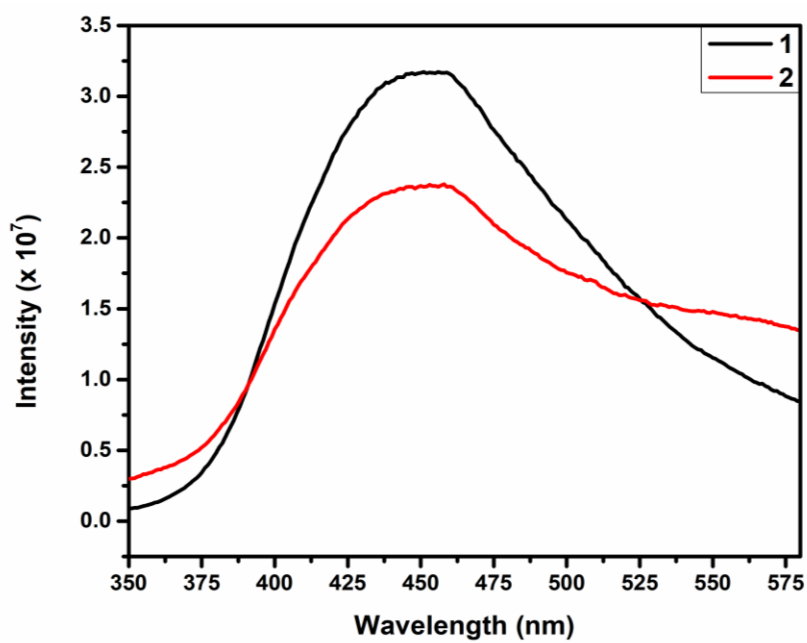

**Fig. S4** Luminescence spectra of **1** and **2** in methanol (excitation wavelength: 310 nm).

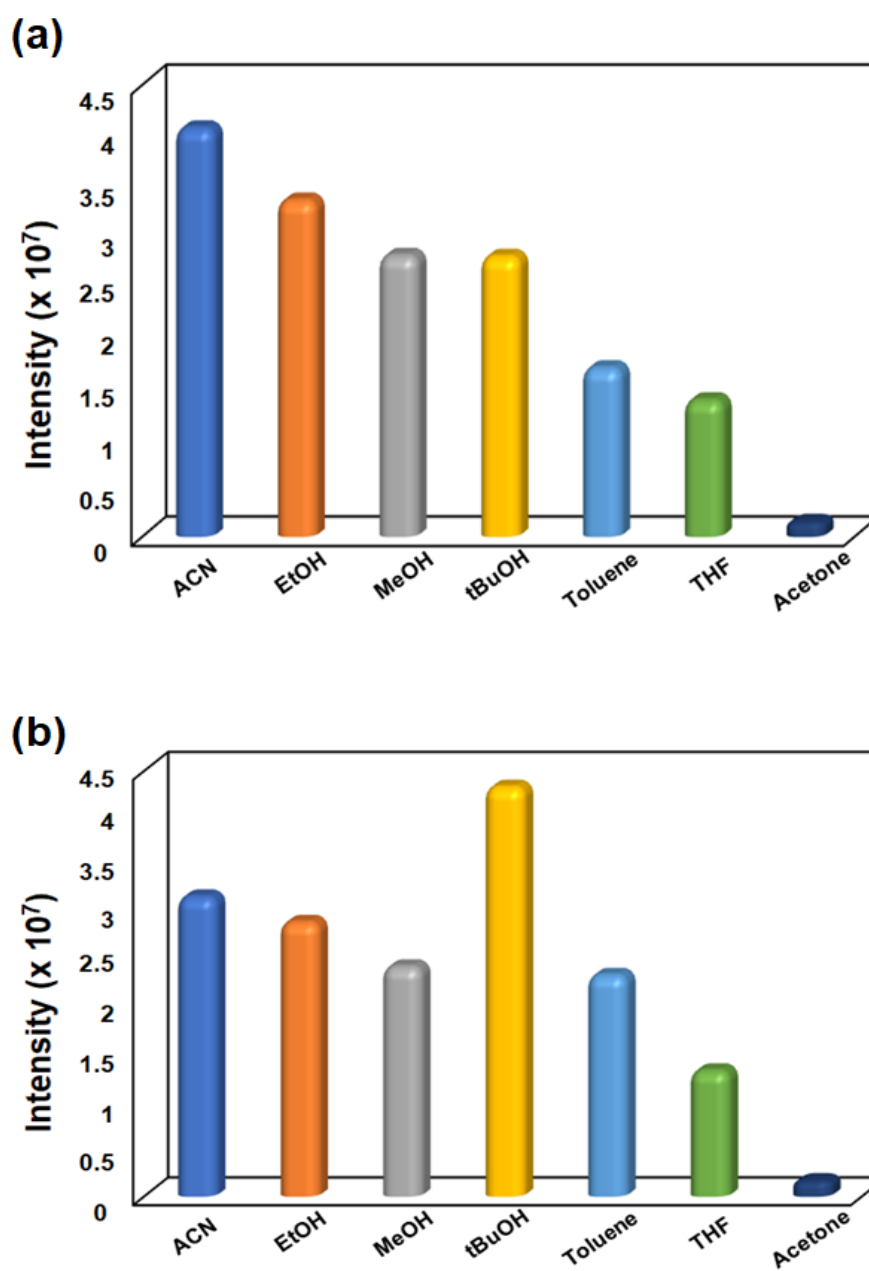

Fig. S5 Sensing of different solvents by (a) **1** and (b) **2**.

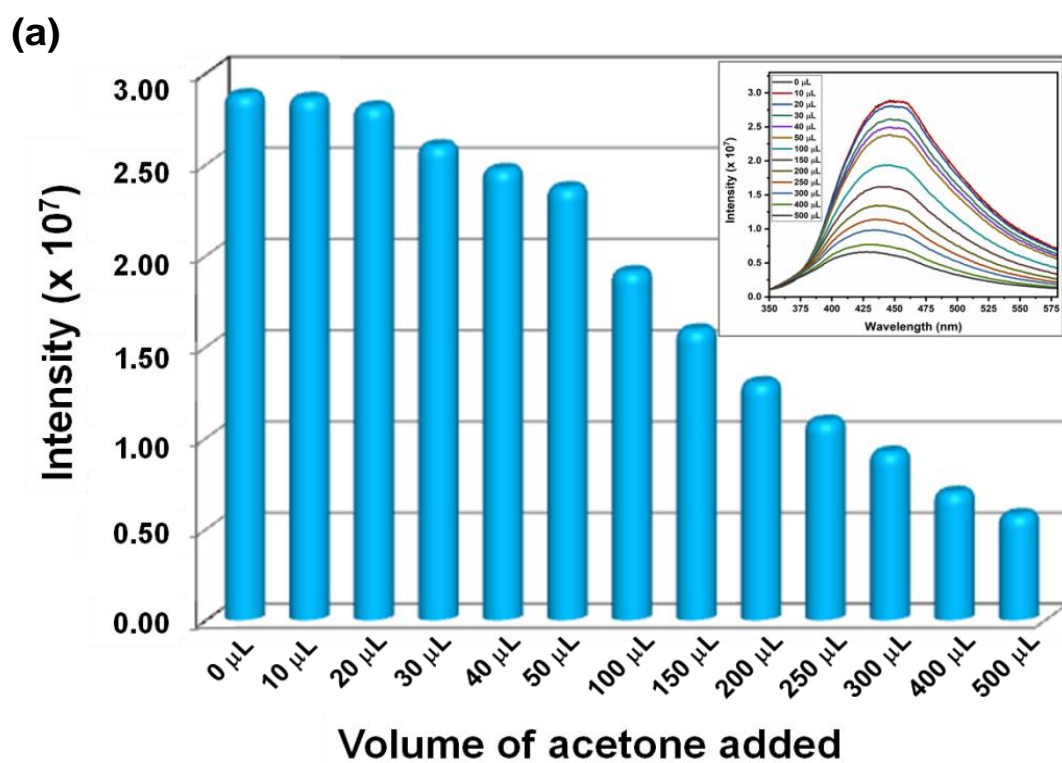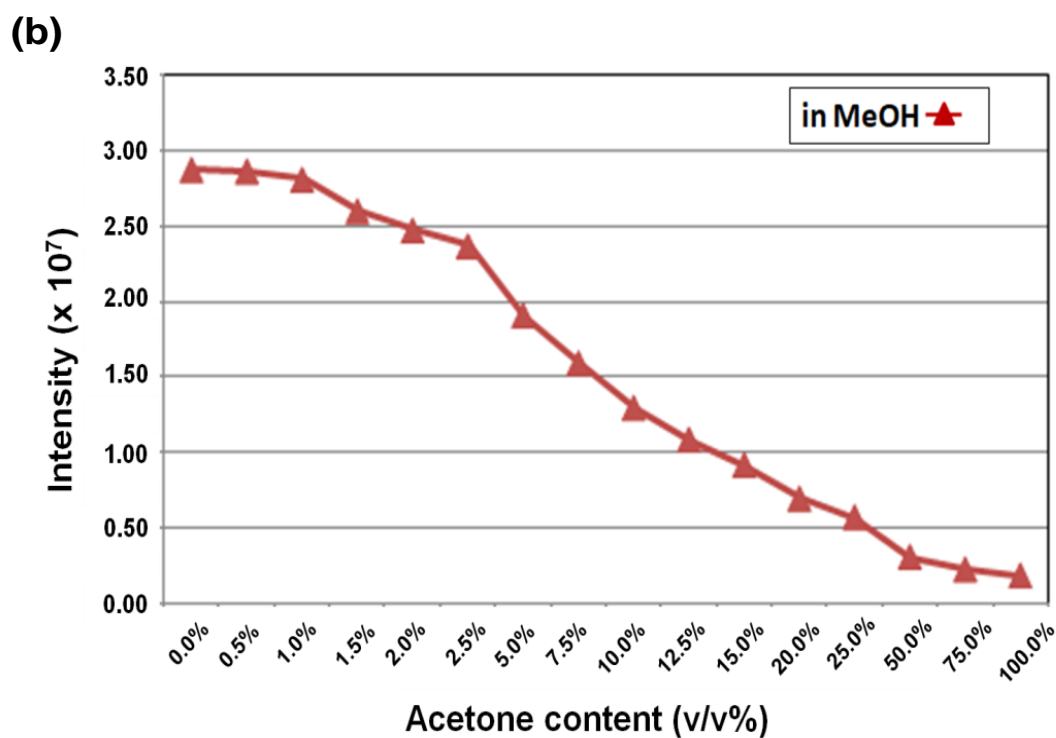

**Fig. S6** Sensing of acetone in MeOH by **1**: change of intensity based on incremental addition of acetone (a) intensity vs volume (inset: spectral changes) and (b) intensity vs content in v/v%.

(a)

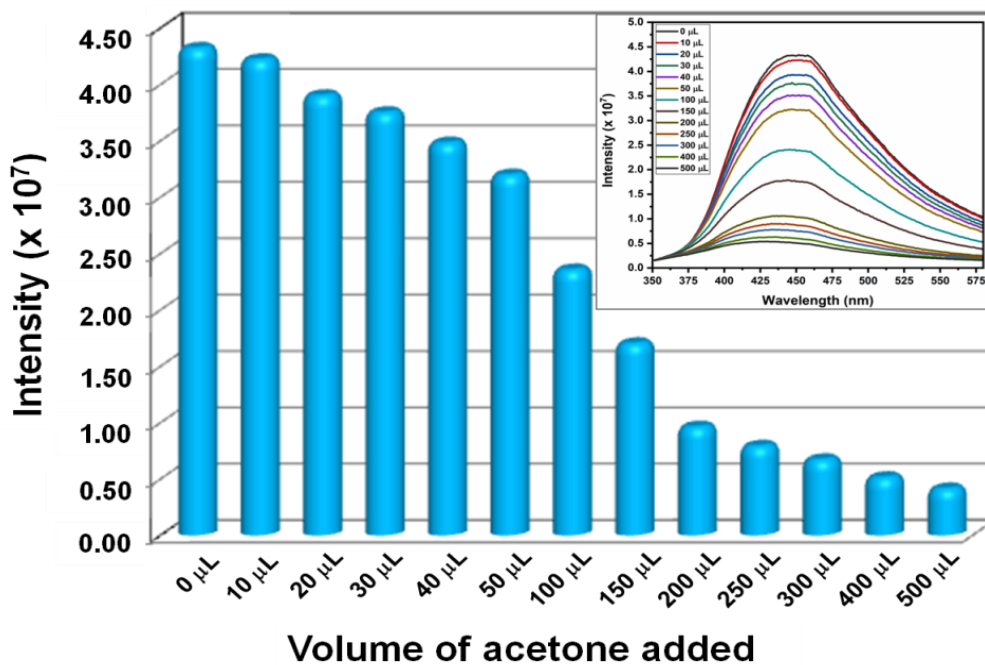

(b)

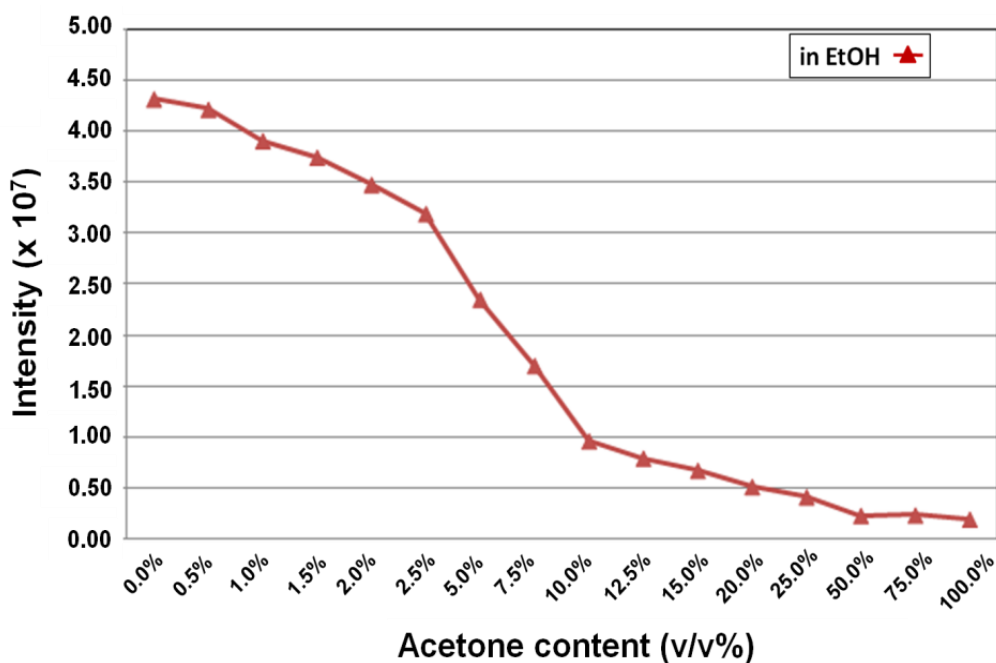

**Fig. S7** Sensing of acetone in EtOH by **1**: change of intensity based on incremental addition of acetone (a) intensity vs volume (inset: spectral changes) and (b) intensity vs content in v/v%.

(a)

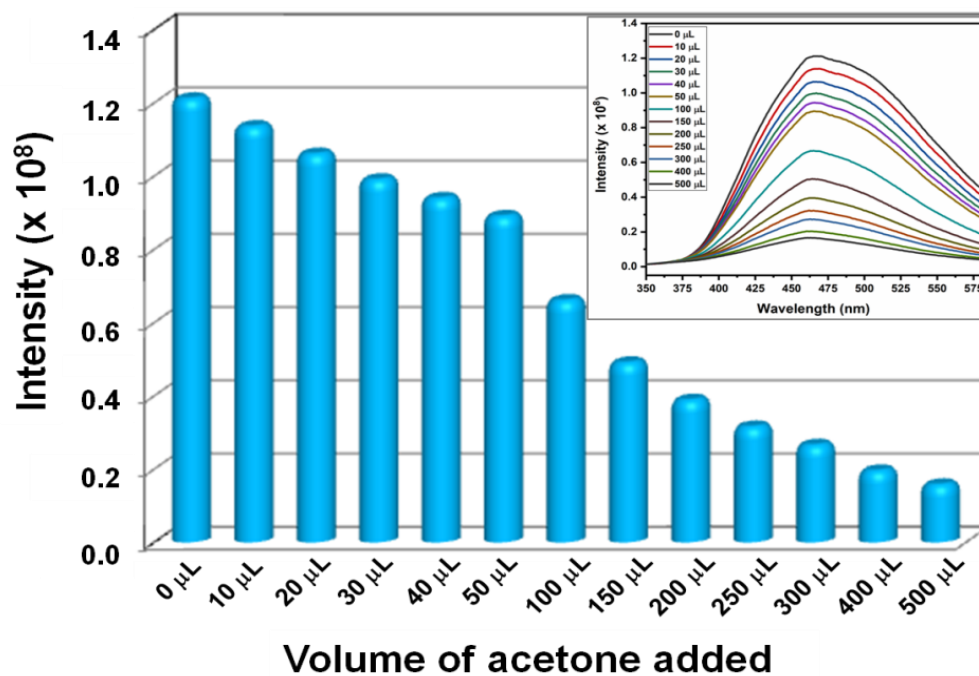

(b)

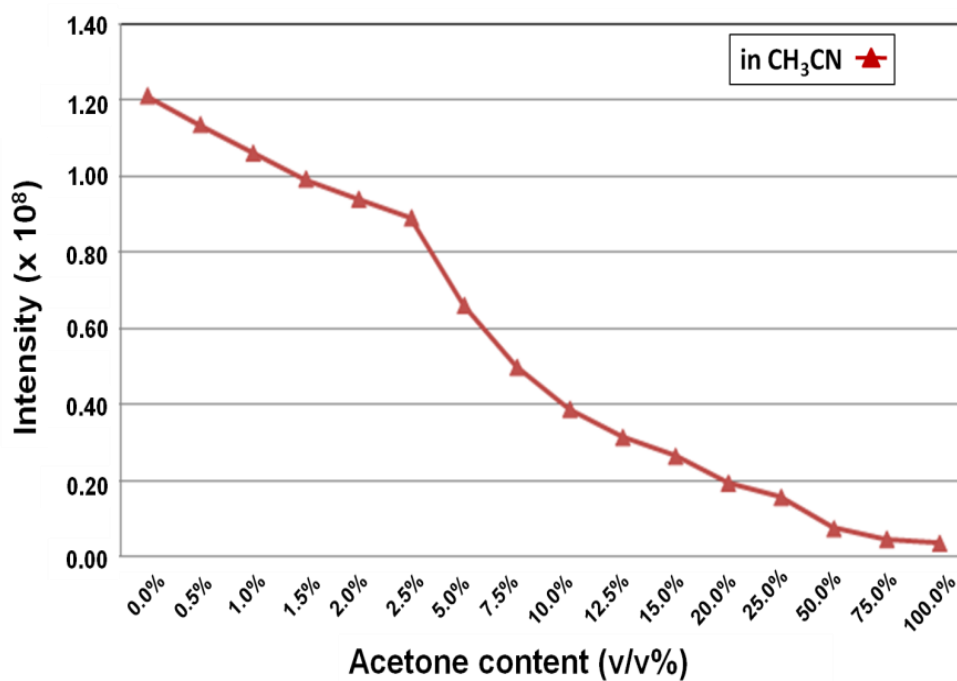

**Fig. S8** Sensing of acetone in CH<sub>3</sub>CN by **1**: change of intensity based on incremental addition of acetone (a) intensity vs volume (inset: spectral changes) and (b) intensity vs content in v/v%.



(a)

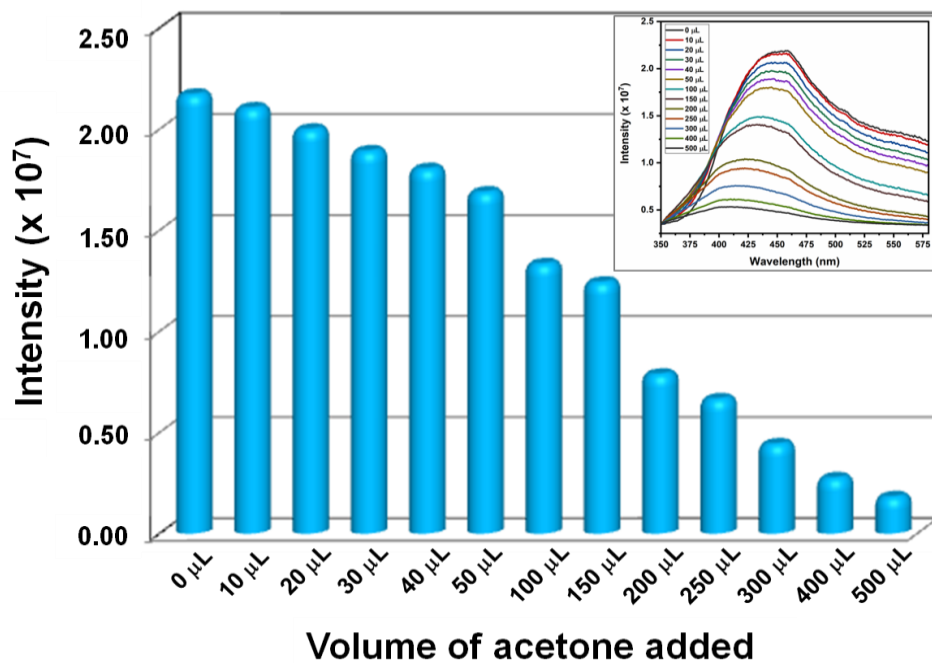

(b)

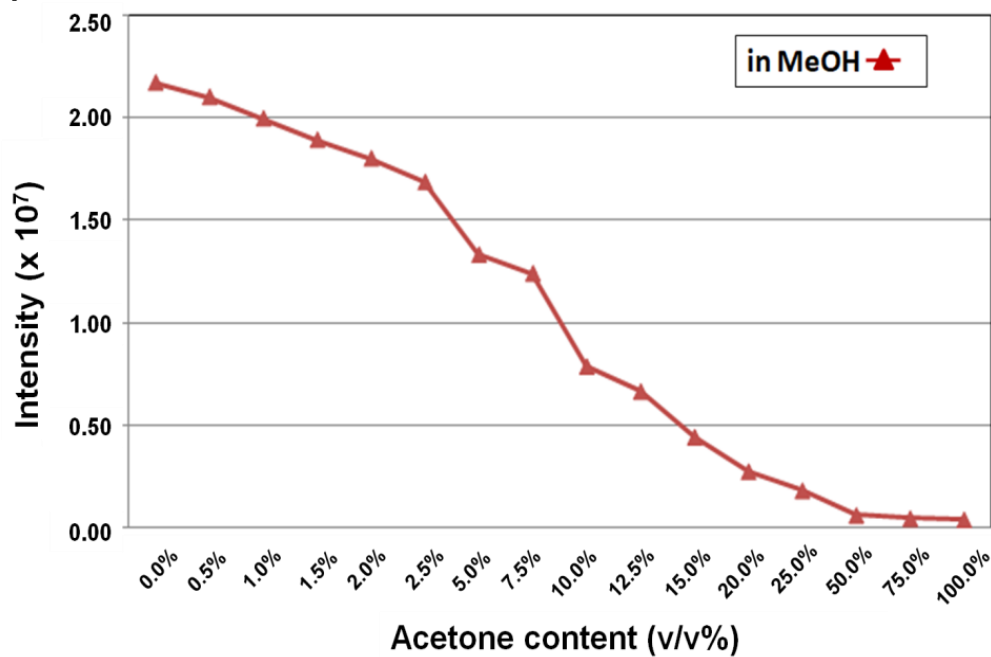

**Fig. S9** Sensing of acetone in MeOH by **2**: change of intensity based on incremental addition of acetone (a) intensity vs volume (inset: spectral changes) and (b) intensity vs content in v/v%.

(a)

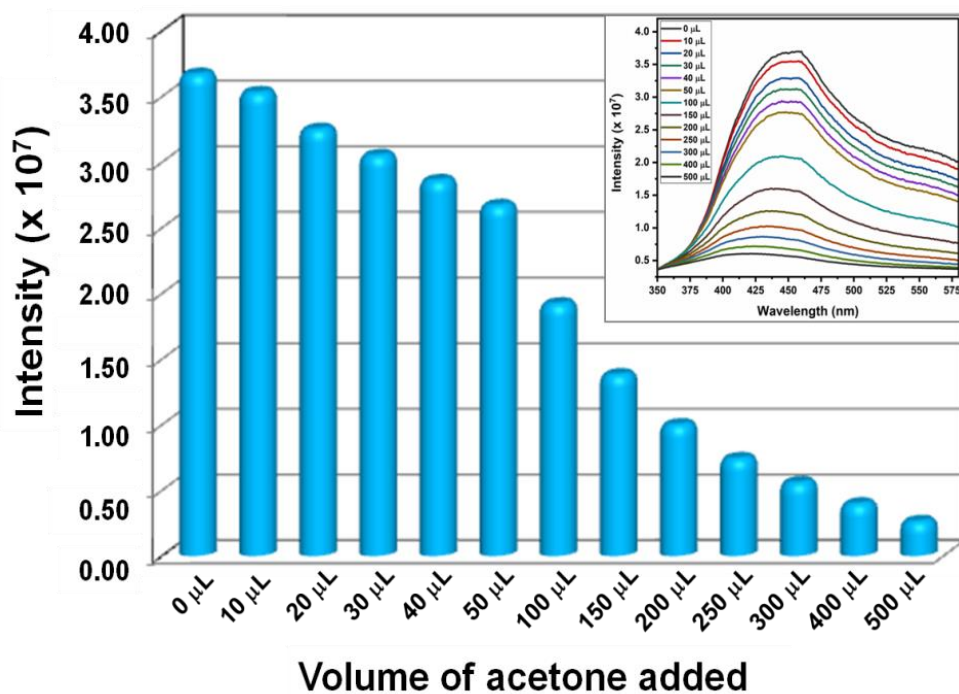

(b)

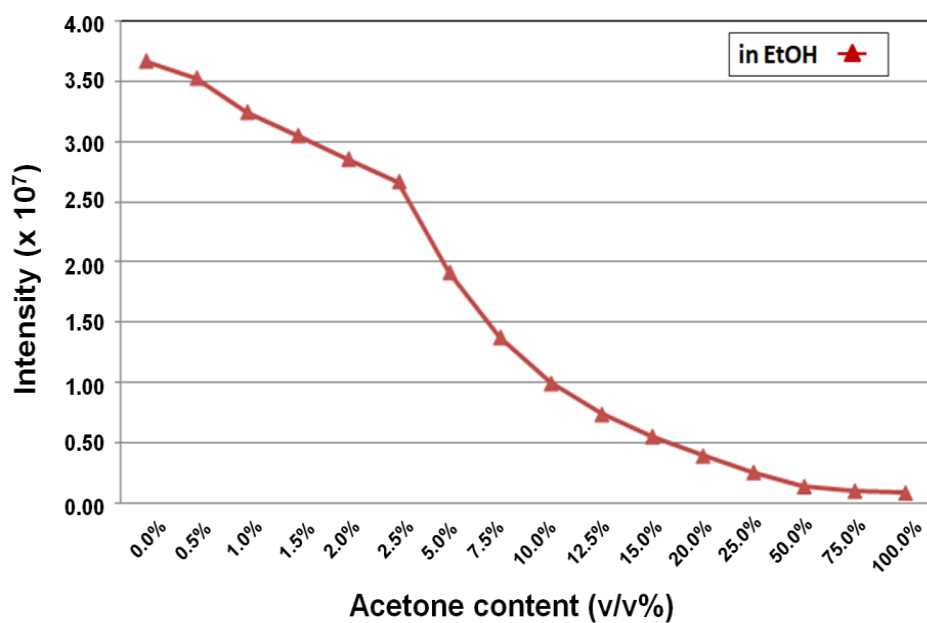

**Fig. S10** Sensing of acetone in EtOH by **2**: change of intensity based on incremental addition of acetone (a) intensity vs volume (inset: spectral changes) and (b) intensity vs content in v/v%.

(a)

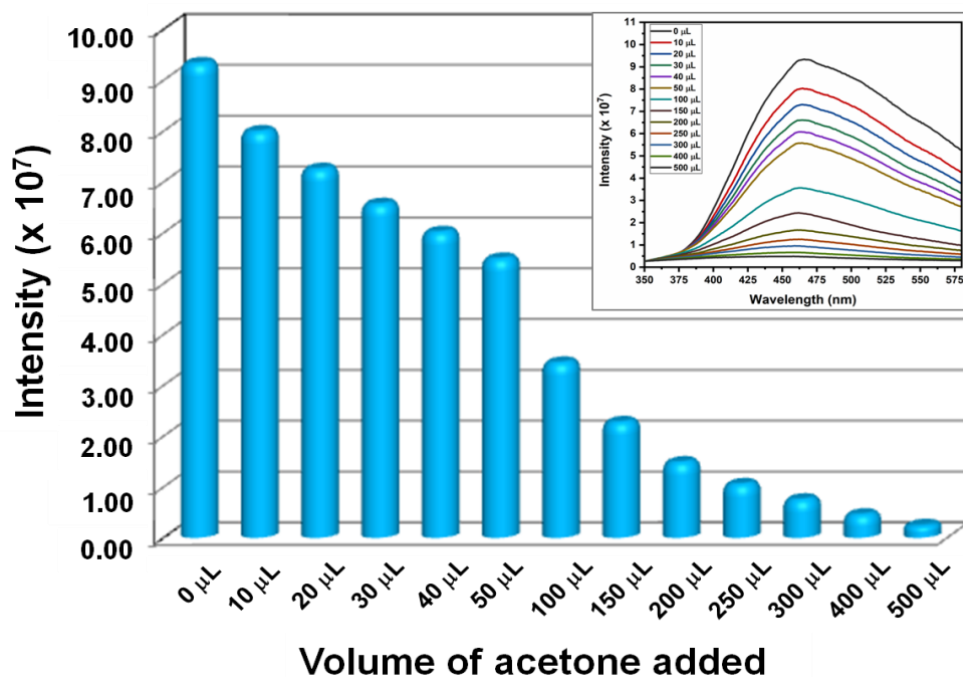

(b)

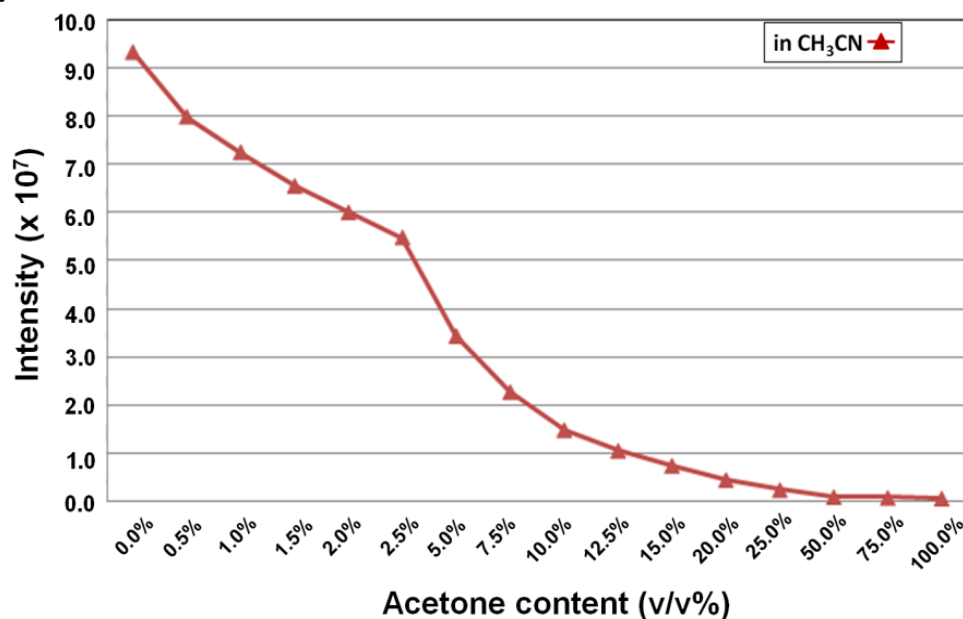

**Fig. S11** Sensing of acetone in  $\text{CH}_3\text{CN}$  by **2**: change of intensity based on incremental addition of acetone (a) intensity vs volume (inset: spectral changes) and (b) intensity vs content in v/v%.

**Determination of detection limit and quantification limit for acetone in 1 and 2 in MeOH, EtOH and CH<sub>3</sub>CN:**

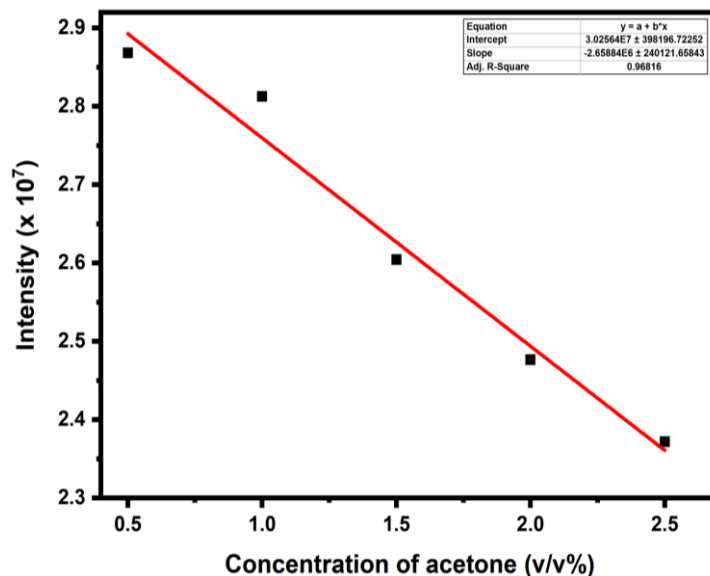

**Fig. S12** Determination of detection limit through fitting of the linear region of fluorescence intensity of **1** in MeOH upon incremental addition of acetone to it at  $\lambda_{em} = 447$  nm (upon  $\lambda_{ex} = 310$  nm) ( $R^2 = 0.968$ ).

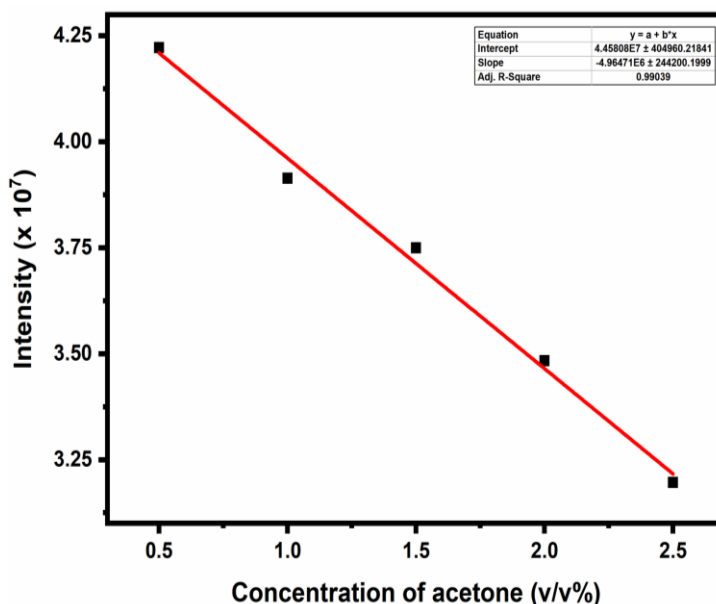

**Fig. S13** Determination of detection limit through fitting of the linear region of fluorescence intensity of **1** in EtOH upon incremental addition of acetone to it at  $\lambda_{em} = 447$  nm (upon  $\lambda_{ex} = 310$  nm) ( $R^2 = 0.99$ ).

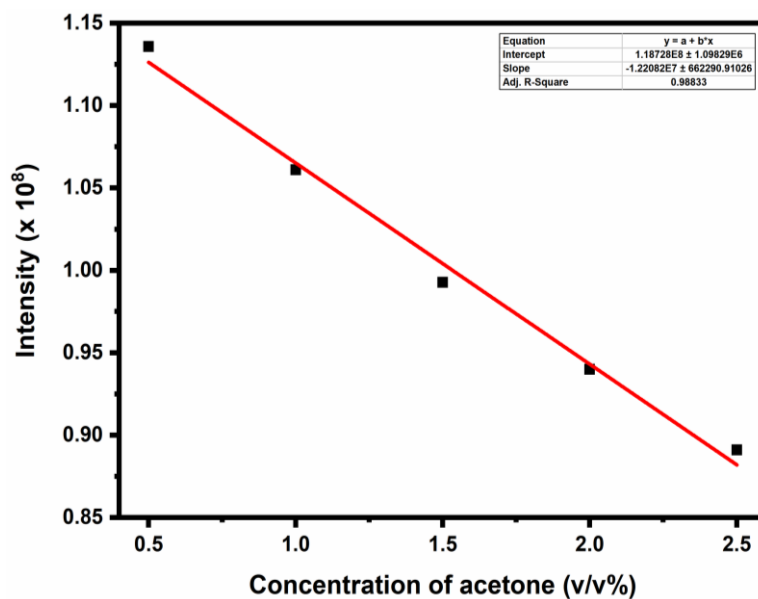

**Fig. S14** Determination of detection limit through fitting of the linear region of fluorescence intensity of **1** in  $\text{CH}_3\text{CN}$  upon incremental addition of acetone to it at  $\lambda_{\text{em}} = 447 \text{ nm}$  (upon  $\lambda_{\text{ex}} = 310 \text{ nm}$ ) ( $R^2 = 0.988$ ).

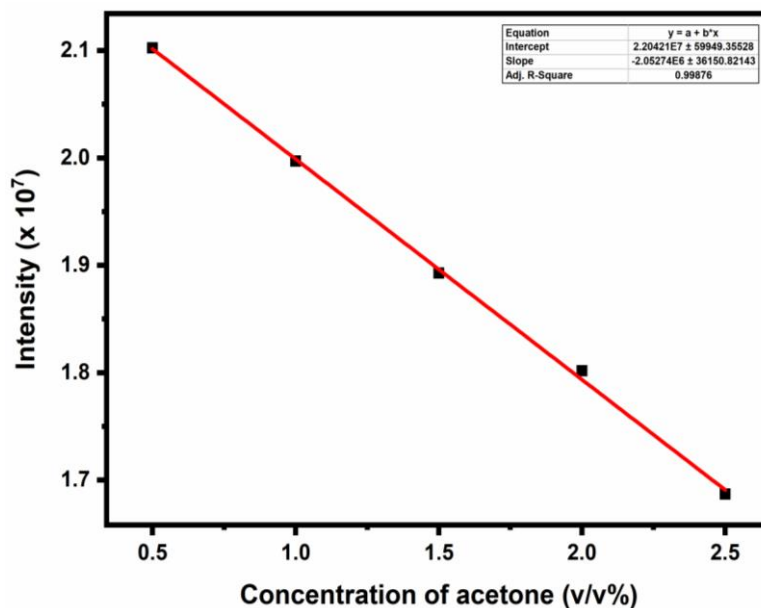

**Fig. S15** Determination of detection limit through fitting of the linear region of fluorescence intensity of **2** in  $\text{MeOH}$  upon incremental addition of acetone to it at  $\lambda_{\text{em}} = 447 \text{ nm}$  (upon  $\lambda_{\text{ex}} = 310 \text{ nm}$ ) ( $R^2 = 0.998$ ).

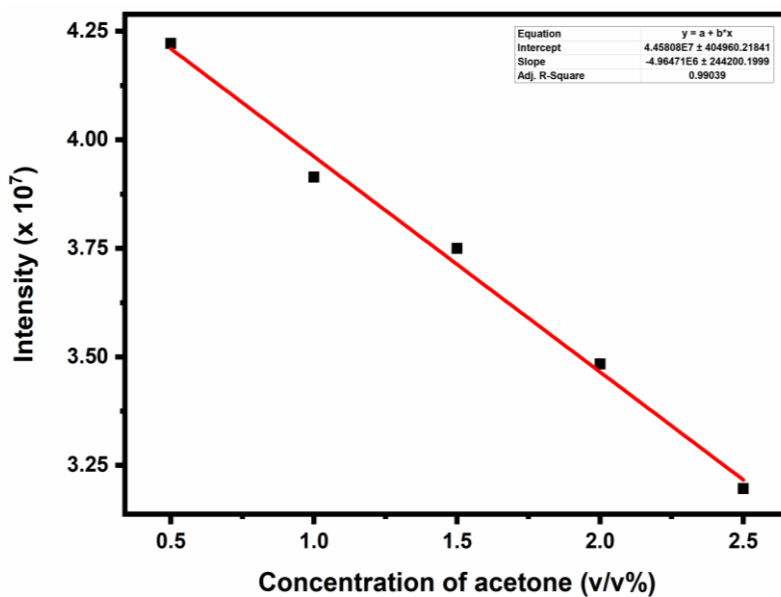

**Fig. S16** Determination of detection limit through fitting of the linear region of fluorescence intensity of **2** in EtOH upon incremental addition of acetone to it at  $\lambda_{em} = 447$  nm (upon  $\lambda_{ex} = 310$  nm) ( $R^2 = 0.99$ ).

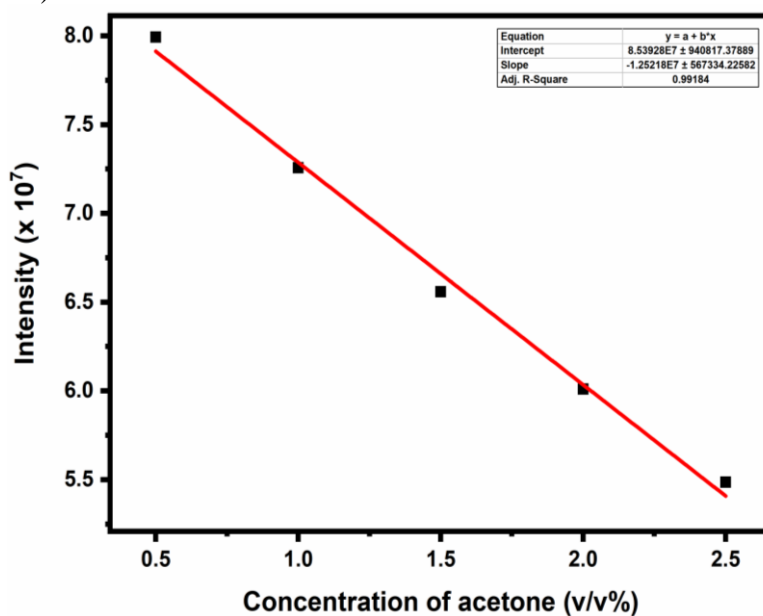

**Fig. S17** Determination of detection limit through fitting of the linear region of fluorescence intensity of **2** in  $CH_3CN$  upon incremental addition of acetone to it at  $\lambda_{em} = 447$  nm (upon  $\lambda_{ex} = 310$  nm) ( $R^2 = 0.991$ ).

**Table S1.** Calculation of detection limits for 1 and 2.

| S. No. | Blank readings (1)              | Fluorescence intensity (x 10 <sup>7</sup> ) |
|--------|---------------------------------|---------------------------------------------|
| 1.     | Reading#1                       | 2.81588                                     |
| 2.     | Reading#2                       | 2.67100                                     |
| 3.     | Reading#3                       | 2.54067                                     |
| 4.     | Reading#4                       | 2.78164                                     |
| 5.     | Reading#5                       | 2.72620                                     |
| 6.     | Standard Deviation ( $\sigma$ ) | 1064425                                     |

| S. No. | Blank readings (2)              | Fluorescence intensity (x 10 <sup>7</sup> ) |
|--------|---------------------------------|---------------------------------------------|
| 1.     | Reading#1                       | 2.21565                                     |
| 2.     | Reading#2                       | 2.39779                                     |
| 3.     | Reading#3                       | 2.36071                                     |
| 4.     | Reading#4                       | 2.77988                                     |
| 5.     | Reading#5                       | 2.27562                                     |
| 6.     | Standard Deviation ( $\sigma$ ) | 2208715                                     |

Detection limit was calculated using the following equation:

$$\text{Detection limit (LoD)} = 3\sigma/m$$

Where ' $\sigma$ ' is the calculated standard deviation from five blank measurements and ' $m$ ' is the slope obtained from the plot of fluorescence emission with increasing concentration of acetone.

| Compound | Solvent medium     | LOD (v/v%) |
|----------|--------------------|------------|
| 1        | CH <sub>3</sub> CN | 0.26       |
| 1        | MeOH               | 1.2        |
| 1        | EtOH               | 0.63       |
| 2        | CH <sub>3</sub> CN | 0.53       |
| 2        | MeOH               | 3.23       |
| 2        | EtOH               | 1.34       |

**Table S2.** Comparison of detection limits for **1** and **2** with those reported in the literature.

| Entry | MOFs                                                                                                                                                                                                      | Analyte | Solvent medium                                                               | LOD (vol%)                                      | Ref. <sup>§</sup> |
|-------|-----------------------------------------------------------------------------------------------------------------------------------------------------------------------------------------------------------|---------|------------------------------------------------------------------------------|-------------------------------------------------|-------------------|
| 1.    | $[\text{Zn}_5(\text{L})_4(\text{H}_2\text{tpim})_2(\text{FA})_4(\text{H}_2\text{O})_2]_n$ ,<br>$[\text{Zn}(\text{L})(\text{H}_2\text{tpim})]_n$                                                           | Acetone | DMF                                                                          | 10<br>25                                        | 7                 |
| 2.    | $\text{Cd}(5\text{-aip})\text{L}\cdot 3\text{DMA}$ ;<br>L = 3,5-di(pyridine-4-yl)-4H-1,2,4-triazol-4-amine                                                                                                | Acetone | DMA                                                                          | 1.812*                                          | 10                |
| 3.    | $[\text{Cu}(\text{tpp})\cdot\text{H}_2\text{O}]_{2n}$                                                                                                                                                     | Acetone | H <sub>2</sub> O                                                             | 0.0842                                          | 11a               |
| 4.    | $[\text{Zn}(\text{L})(\text{bpdc})]\cdot 1.6\text{H}_2\text{O}$ ,<br>$[\text{Cu}_2(\text{L})(\text{Hbptc})_2]$ ;<br>L = 1,4-di(1H-imidazol-4-yl)benzene                                                   | Acetone | DMF                                                                          | 0.0478<br>0.0465                                | 11b               |
| 5.    | $[\text{Cd}(\text{Tipb})(\text{pta})_{0.5}(\text{H}_2\text{O})(\text{NO}_3)]\cdot(\text{DMF})_x(\text{H}_2\text{O})_y$<br>$[\text{Cd}(\text{Tipb})(\text{mta})]\cdot(\text{DMF})_x(\text{H}_2\text{O})_y$ | Acetone | CH <sub>3</sub> CN                                                           | 0.084<br>0.075                                  | 11c               |
| 6.    | $[\text{Zn}_2(\text{TPC4A})(\text{DMF})(\text{H}_2\text{O})_4]\cdot 3\text{H}_2\text{O}$                                                                                                                  | Acetone | EtOH                                                                         | 5                                               | 11f               |
| 7.    | $[\text{Zn}_2(2,5\text{-PDC})(\text{H}_2\text{O})_2]\cdot\text{H}_2\text{O}/\text{Tb}^{3+}$                                                                                                               | Acetone | H <sub>2</sub> O                                                             | 55 <sup>#</sup>                                 | 11g               |
| 8.    | $[\text{Cd}_3(\text{L}')_2(\text{BTB})_2(\text{H}_2\text{O})]\cdot\text{DMF}\cdot\text{H}_2\text{O}$ ;<br>L' = 1,3-di(1H-imidazol-4-yl)benzene                                                            | Acetone | CH <sub>3</sub> CN                                                           | 0.122                                           | 11e               |
| 9.    | $[\text{Eu}(\text{BTC})]$                                                                                                                                                                                 | Acetone | 1-propanol                                                                   | N.R.                                            | 9                 |
| 10.   | $[\text{Eu}_2(\mu_2\text{-pzdc})(\mu_4\text{-pzdc})(\mu_2\text{-ox})(\text{H}_2\text{O})_4]\cdot 8\text{H}_2\text{O}$                                                                                     | Acetone | MeOH                                                                         | N.R.                                            | 11d               |
| 11.   | $[\text{Eu}(\text{BTB})(\text{H}_2\text{O})_2\cdot(\text{solvent})]_n$ ,<br>$[\text{Eu}(\text{BTB})]$                                                                                                     | Acetone | EtOH                                                                         | 0.3<br>0.01                                     | 11h               |
| 12.   | $\{[\text{Zn}(\text{bpaipa})]\cdot\text{DMF}\cdot 2\text{H}_2\text{O}\}_n$ ( <b>1</b> )<br><br>$\{[\text{Zn}(\text{bpaipa})]\cdot 5\text{H}_2\text{O}\}_n$ ( <b>2</b> )                                   | Acetone | MeOH<br>EtOH<br>CH <sub>3</sub> CN<br><br>MeOH<br>EtOH<br>CH <sub>3</sub> CN | 1.2<br>0.63<br>0.26<br><br>3.23<br>1.34<br>0.53 | This work         |

LOD units for these sensors are in \*mM and <sup>#</sup> ppm. <sup>§</sup> These reference numbers are as cited in the main text. N.R.= not reported.



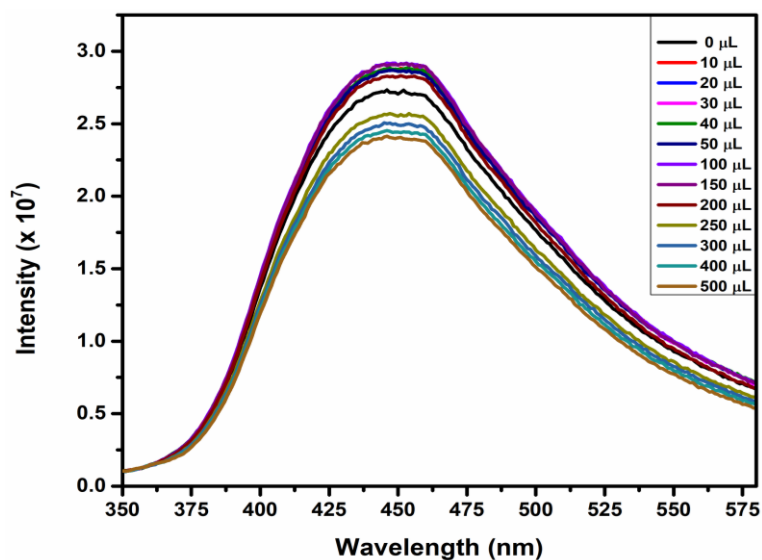

**Fig. S18** Emission spectra of **1** (dispersed in methanol) upon incremental addition of 20 mM acetone solution.

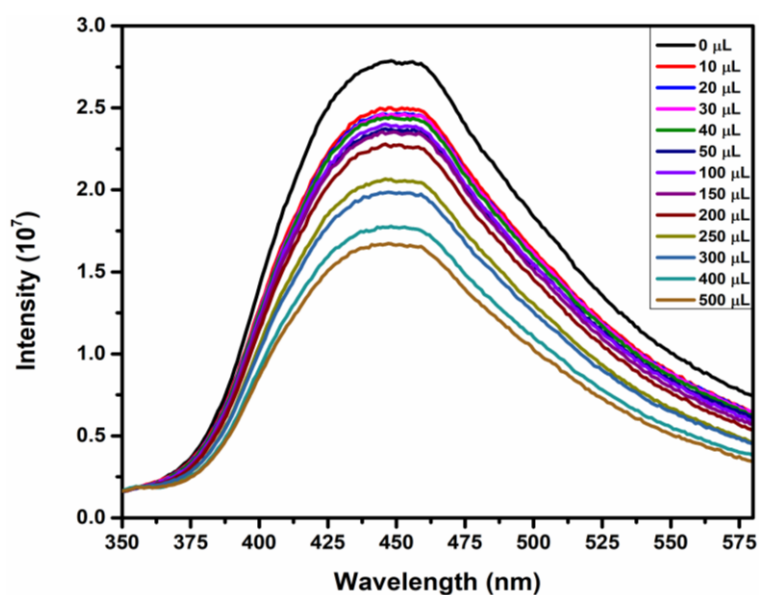

**Fig. S19** Emission spectra of **1** (dispersed in methanol) upon incremental addition of 20 mM acetophenone solution.

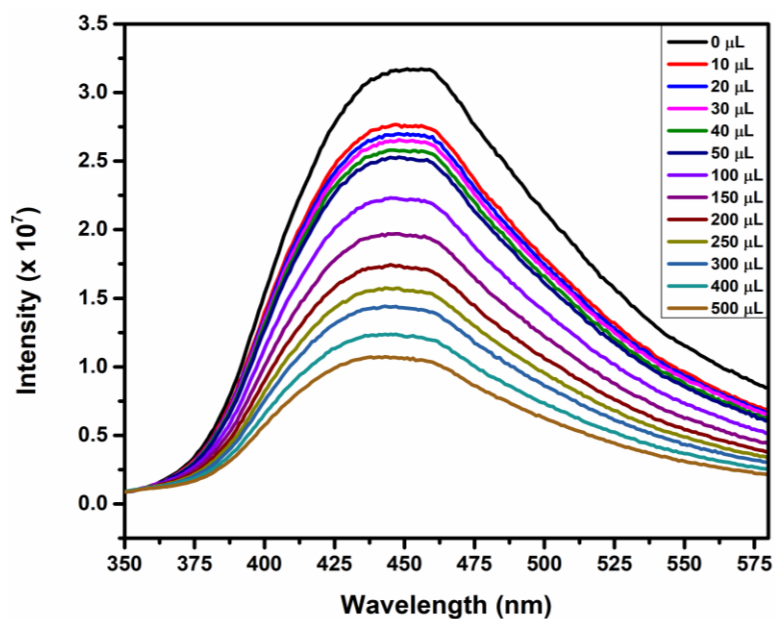

**Fig. S20** Emission spectra of **1** (dispersed in methanol) upon incremental addition of 20 mM acetylacetone solution.

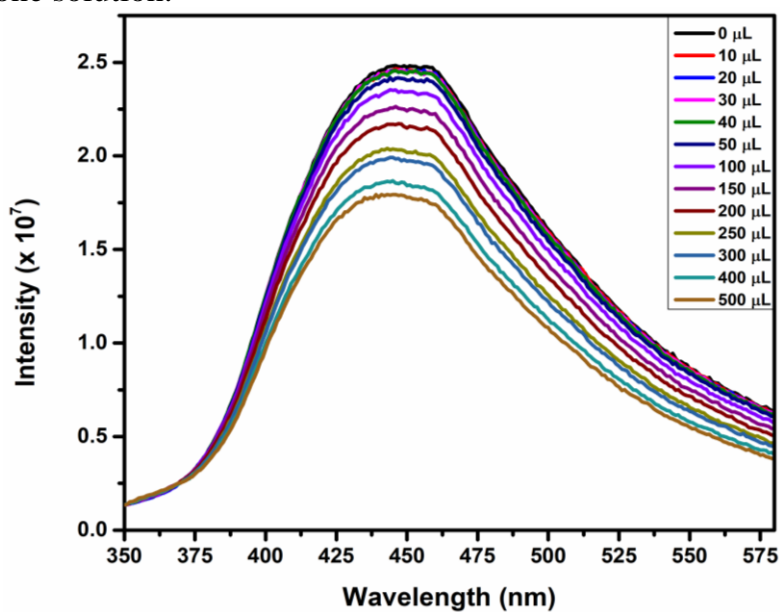

**Fig. S21** Emission spectra of **1** (dispersed in methanol) upon incremental addition of 20 mM mesityl oxide solution.

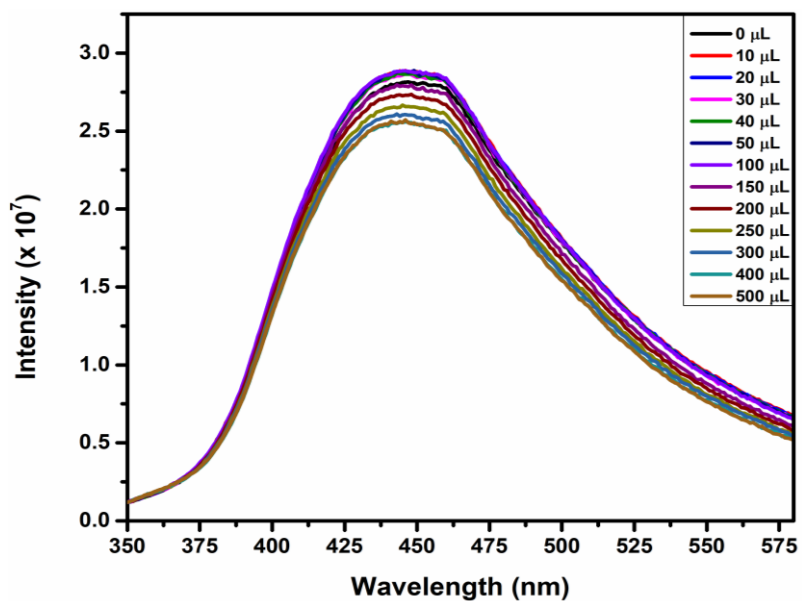

**Fig. S22** Emission spectra of **1** (dispersed in methanol) upon incremental addition of 20 mM cyclohexanone solution.

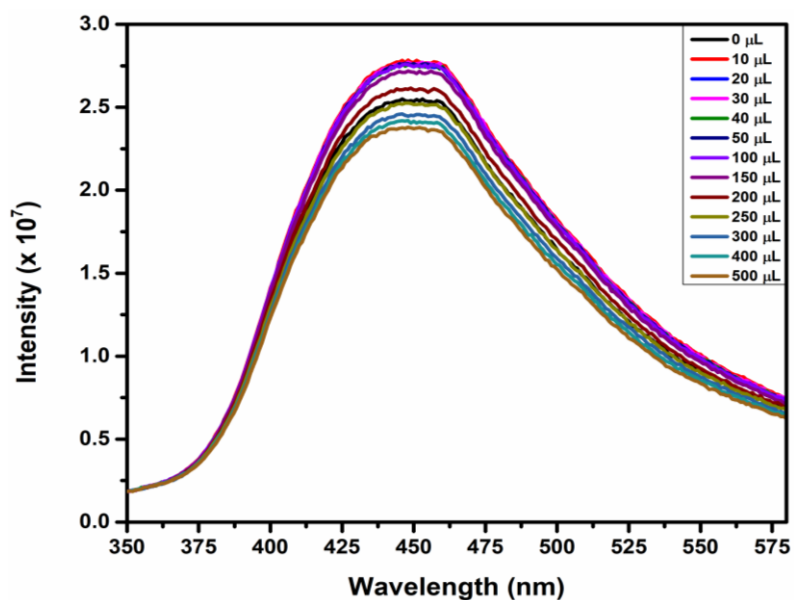

**Fig. S23** Emission spectra of **1** (dispersed in methanol) upon incremental addition of 20 mM cyclopentanone solution.

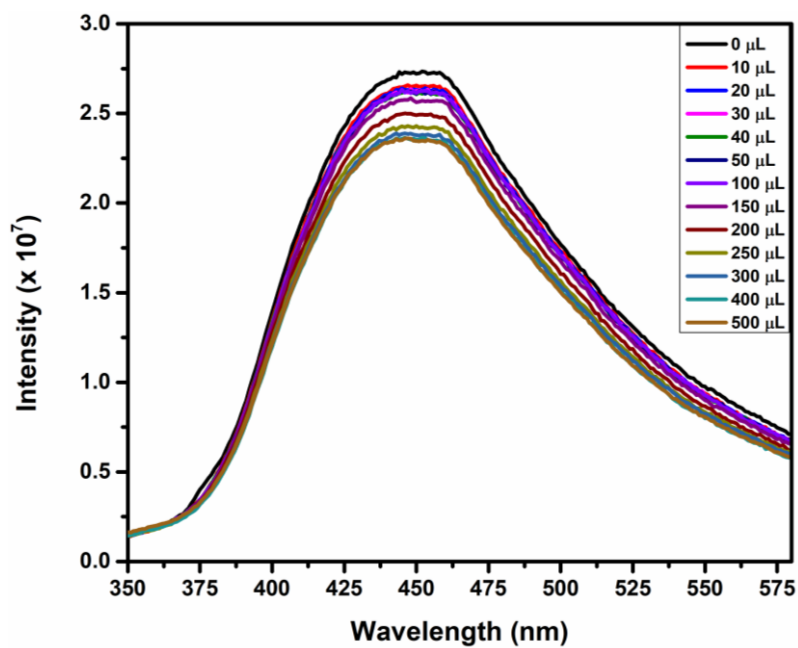

**Fig. S24** Emission spectra of **1** (dispersed in methanol) upon incremental addition of 20 mM 3-pentanone.

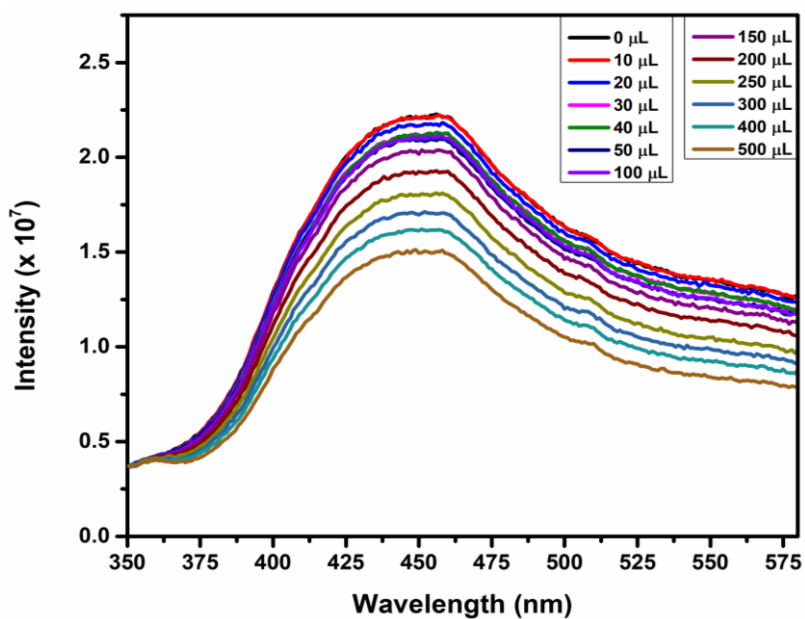

**Fig. S25** Emission spectra of **2** (dispersed in methanol) upon incremental addition of 20 mM acetone solution.

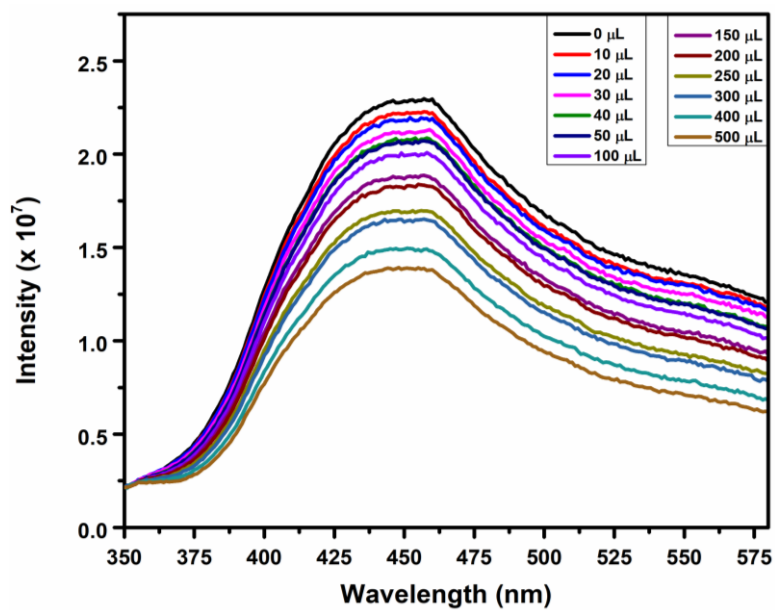

**Fig. S26** Emission spectra of **2** (dispersed in methanol) upon incremental addition of 20 mM acetophenone solution.

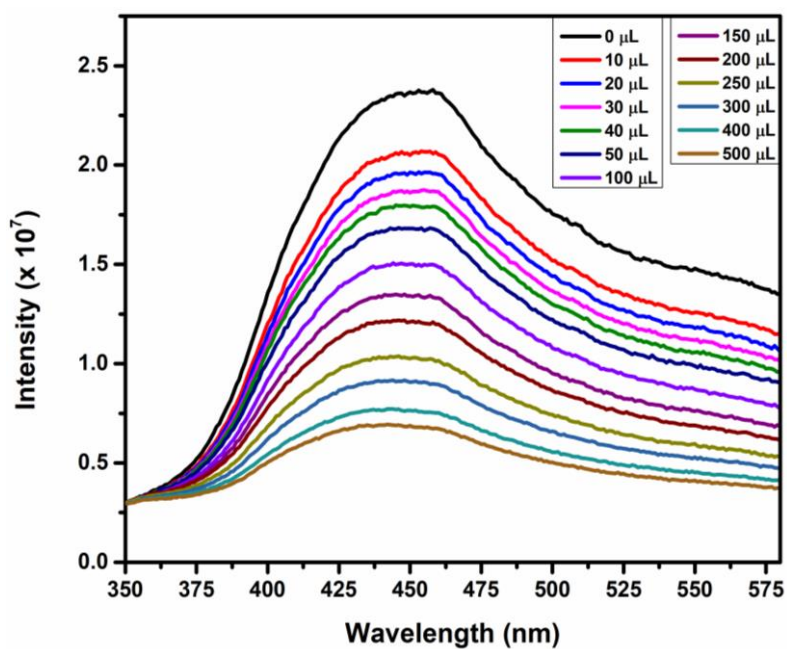

**Fig. S27** Emission spectra of **2** (dispersed in methanol) upon incremental addition of 20 mM acetylacetone solution.

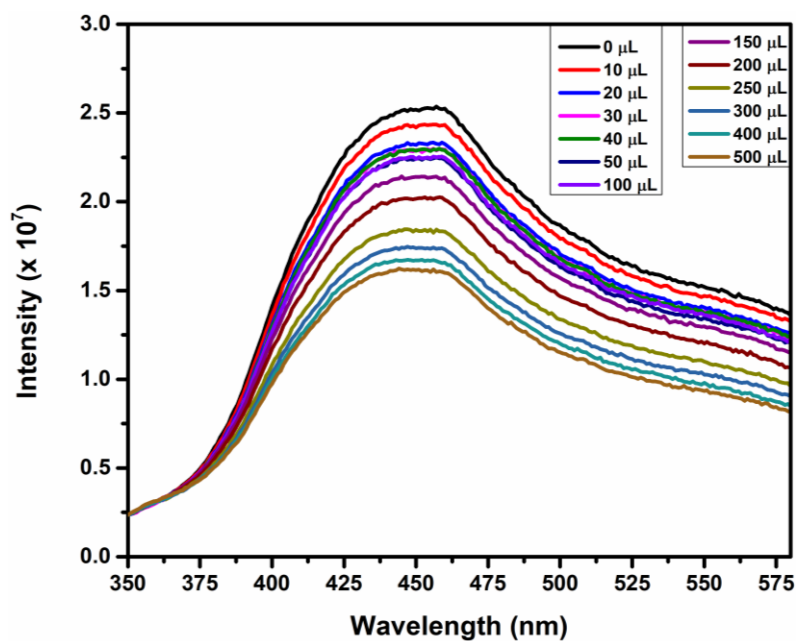

**Fig. S28** Emission spectra of **2** (dispersed in methanol) upon incremental addition of 20 mM mesityl oxide solution.

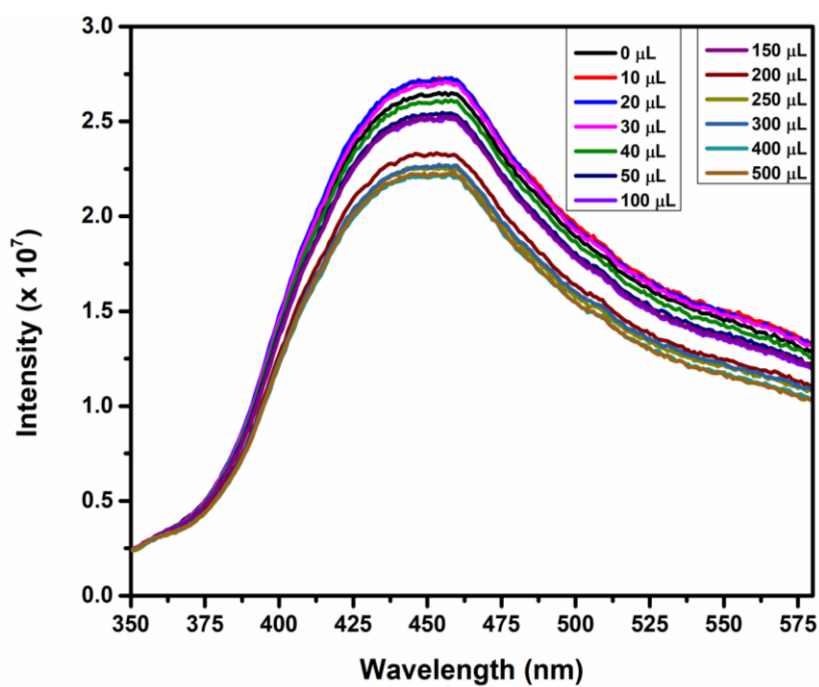

**Fig. S29** Emission spectra of **2** (dispersed in methanol) upon incremental addition of 20 mM cyclohexanone solution.

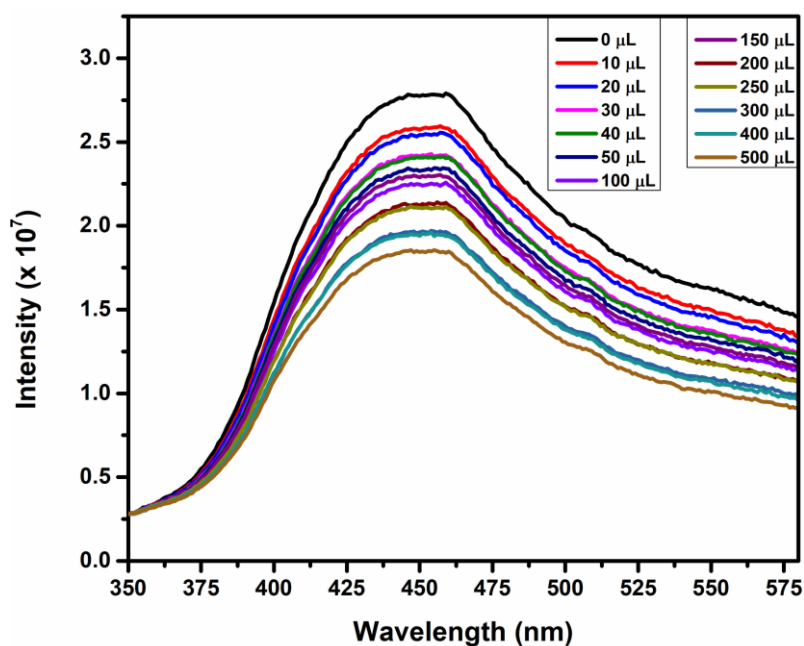

**Fig. S30** Emission spectra of **2** (dispersed in methanol) upon incremental addition of 20 mM cyclopentanone solution.

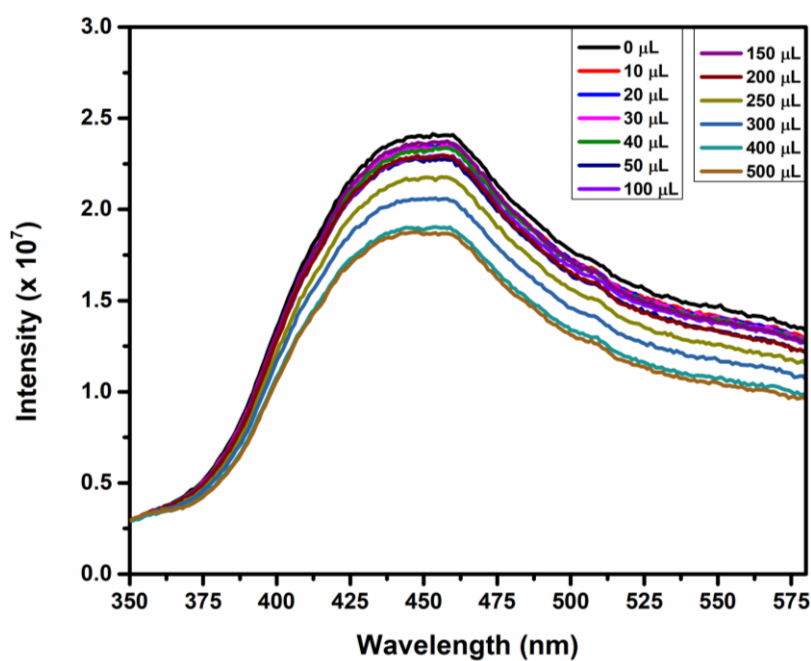

**Fig. S31** Emission spectra of **2** (dispersed in methanol) upon incremental addition of 20 mM 3-pentanone solution.

## Detection Limit Calculation and Determination of Stern-Volmer Constant

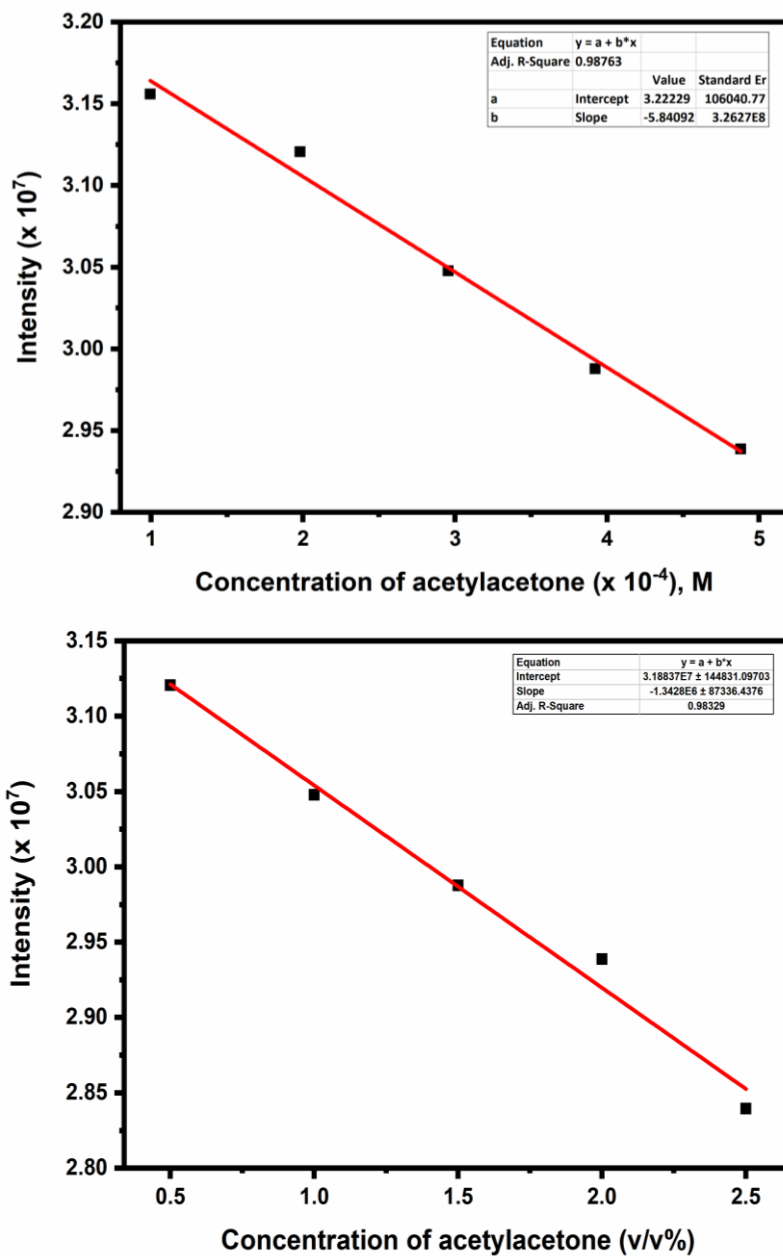

**Fig. S32** Determination of detection limit through fitting of the linear region of fluorescence intensity of **1** upon incremental addition of acetylacetone to it at  $\lambda_{em} = 447$  nm (upon  $\lambda_{ex} = 310$  nm) ( $R^2 = 0.987$ ).



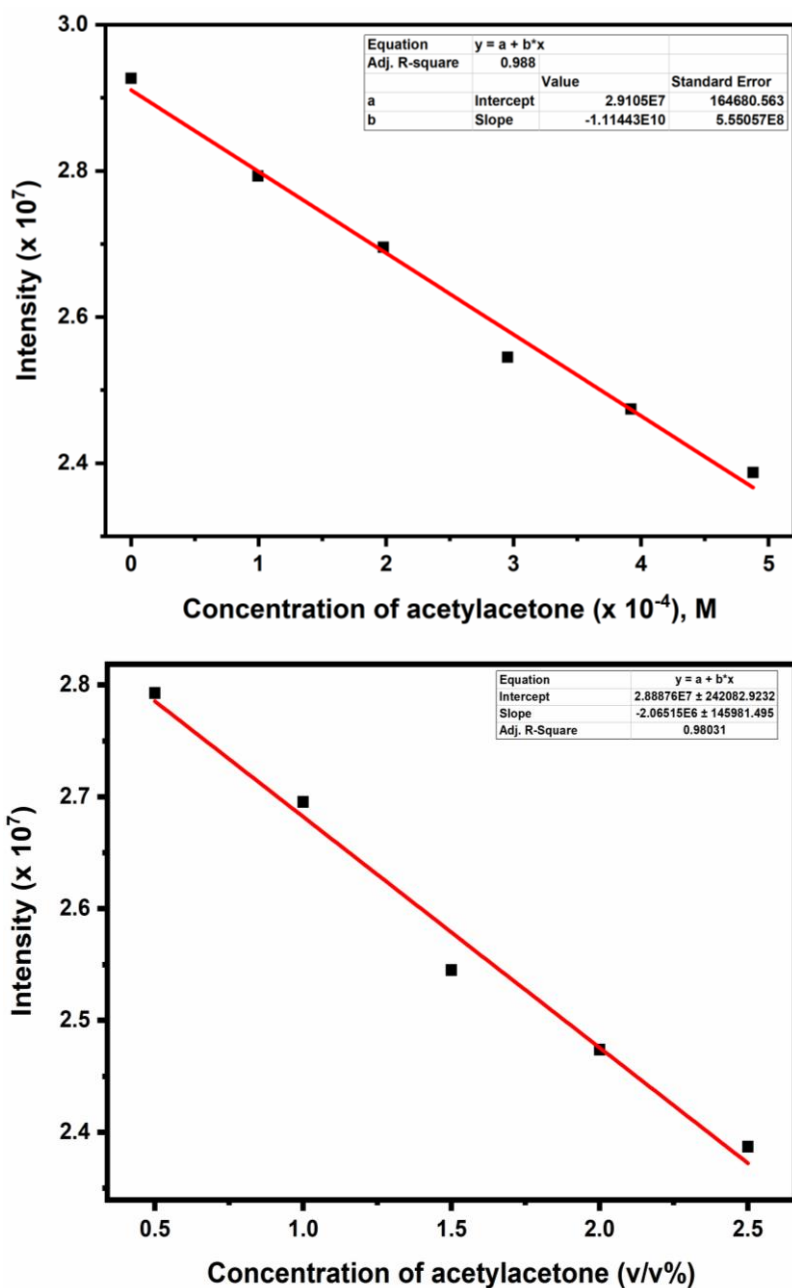

**Fig. S33** Determination of detection limit through fitting of the linear region of fluorescence intensity of **2** upon incremental addition of acetylacetone to it at  $\lambda_{em} = 447$  nm (upon  $\lambda_{ex} = 310$  nm) ( $R^2 = 0.988$ ).

### Determination of detection limit and quantification limit for acetylacetone in 1 and 2:

Detection limit was calculated using the following equation:

$$\text{Detection limit (LoD)} = 3\sigma/m$$

$$\text{Quantification limit (LoQ)} = 10\sigma/m$$

Where 'σ' is the calculated standard deviation from five blank measurements and 'm' is the slope obtained from the plot of fluorescence emission with increasing concentration of acetylacetone.

| Compound | LOD                                  | LOQ                     |
|----------|--------------------------------------|-------------------------|
| 1        | 54.7 ppm<br>(546.7 μM),<br>2.38 v/v% | 182.4 ppm<br>7.93 v/v%  |
| 2        | 59.5 ppm<br>(594.5 μM),<br>4.94 v/v% | 198.4 ppm<br>16.47 v/v% |

### Determination of Stern-Volmer constant for acetylacetone in 1 and 2:

The Stern-Volmer equation:

$$I_0/I = 1 + K_{SV}[A],$$

Where  $K_{SV}$  is the quenching constant ( $M^{-1}$ ), [A] is molar concentration of the acetylacetone analyte and  $I_0$  and  $I$  are the emission intensities of 1 or 2, before and after addition of acetylacetone analyte, respectively.

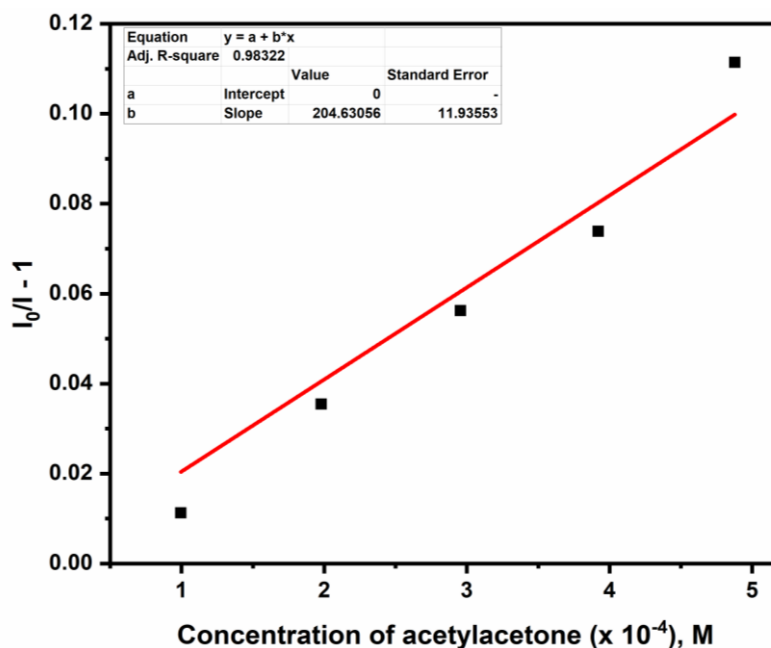

**Fig. S34** Stern-Volmer (SV) plot for acetylacetone in 1. The relative fluorescence intensity is linear with acetylacetone concentration in the range of 1–5  $\times 10^{-4}$  M,  $I_0/I = 1 + 204.63056 [\text{Acetylacetone}]$  ( $R^2 = 0.983$ ).

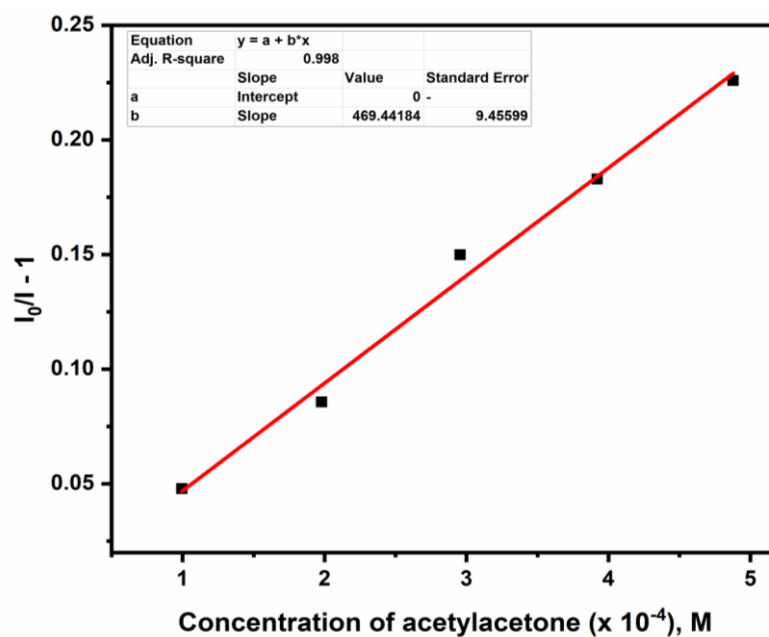

**Fig. S35** Stern-Volmer (SV) plot for acetylacetone in **2**. The relative fluorescence intensity is linear with acetylacetone concentration in the range of  $1\text{--}5 \times 10^{-4}$  M,  $I_0/I = 1 + 469.44184 [\text{Acetylacetone}]$  ( $R^2 = 0.998$ ).

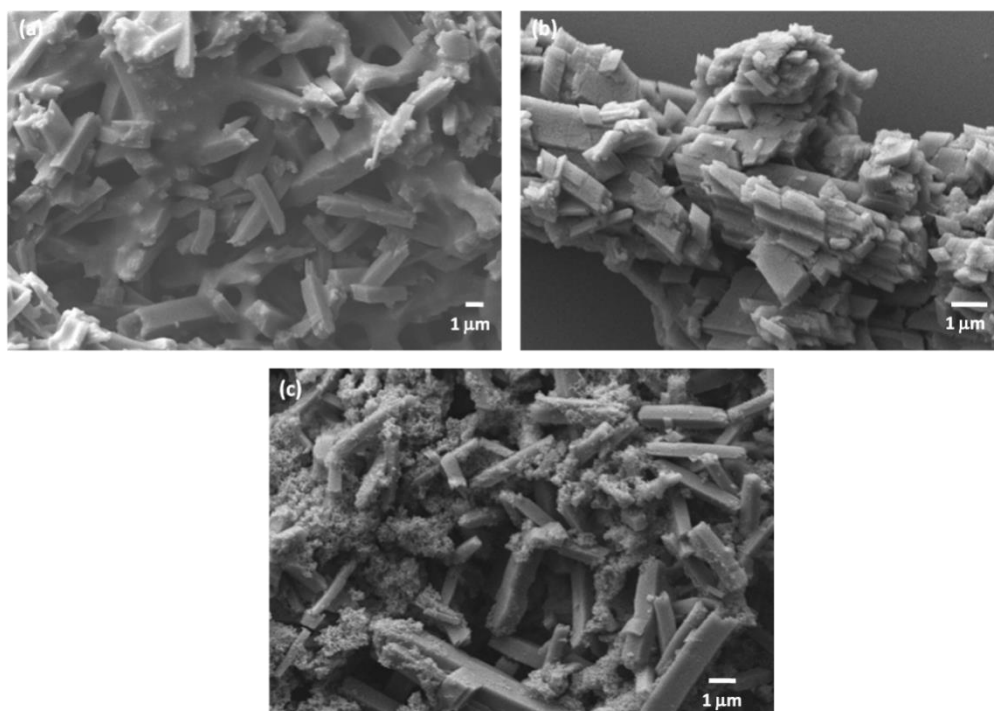

**Fig. S36** FESEM images of **1**: before (a) and (b,c) after dipping in different ketones (acetophenone and cyclohexanone, respectively).

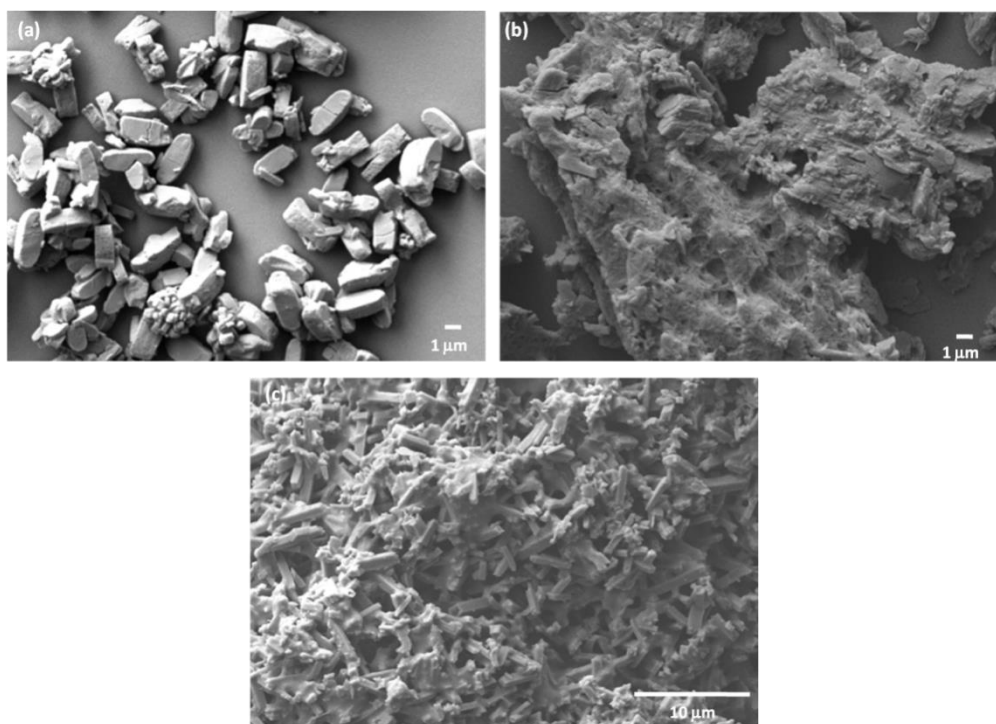

**Fig. S37** FESEM images of **2**: before (a) and (b,c) after dipping in different ketones (acetophenone and cyclohexanone, respectively).

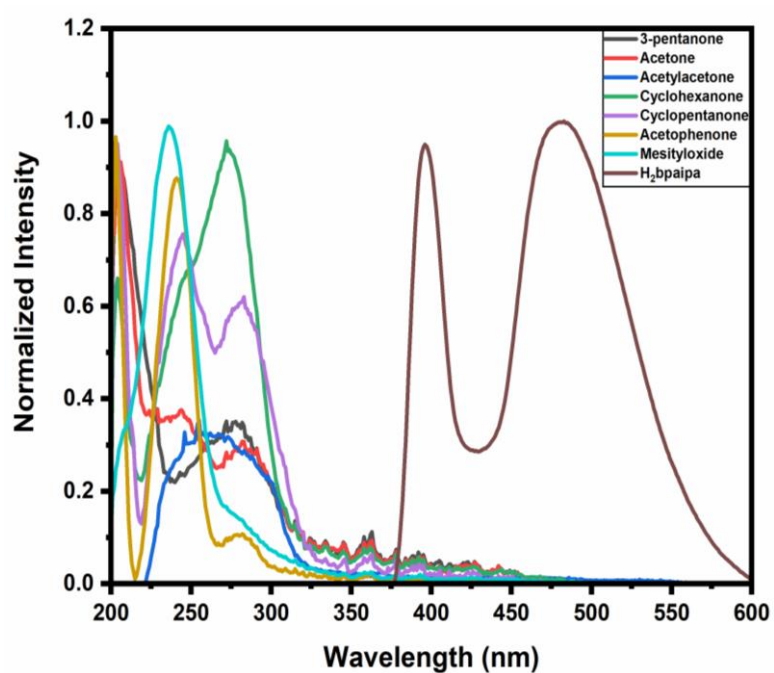

**Fig. S38** Spectral overlap of absorption spectra of different ketone analytes and emission spectra of the ligand H<sub>2</sub>bpaipa.

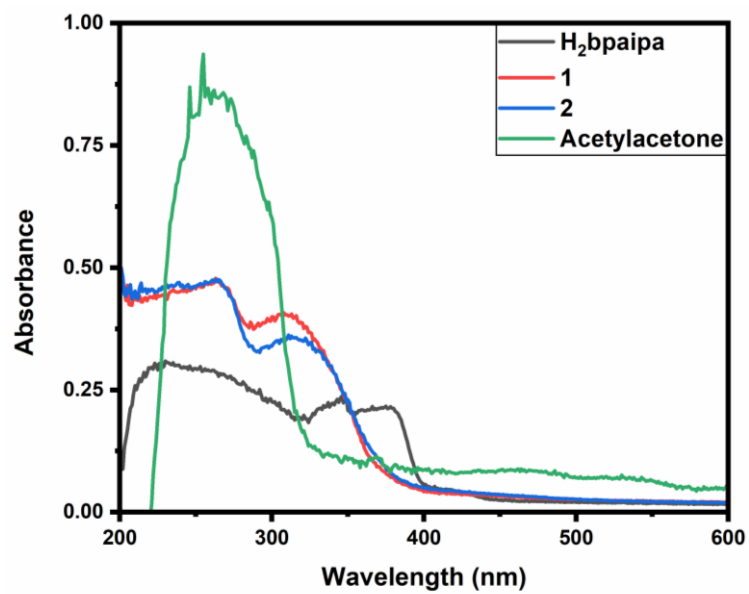

**Fig. S39** Spectral overlap of absorption spectra of H<sub>2</sub>bpaipa, **1**, **2** and acetylacetone.
